# Supplementary figures and images for: Metformin elicits antitumour effect by modulation of the gut microbiota and rescues Fusobacterium nucleatum-induced colorectal tumourigenesis
Source: PubMed Central journal article supplement — eBioMedicine. 2020 Oct 9;61:103037. doi: 10.1016/j.ebiom.2020.103037 (PMC7553239; doi:10.1016/j.ebiom.2020.103037), 2020-10-09

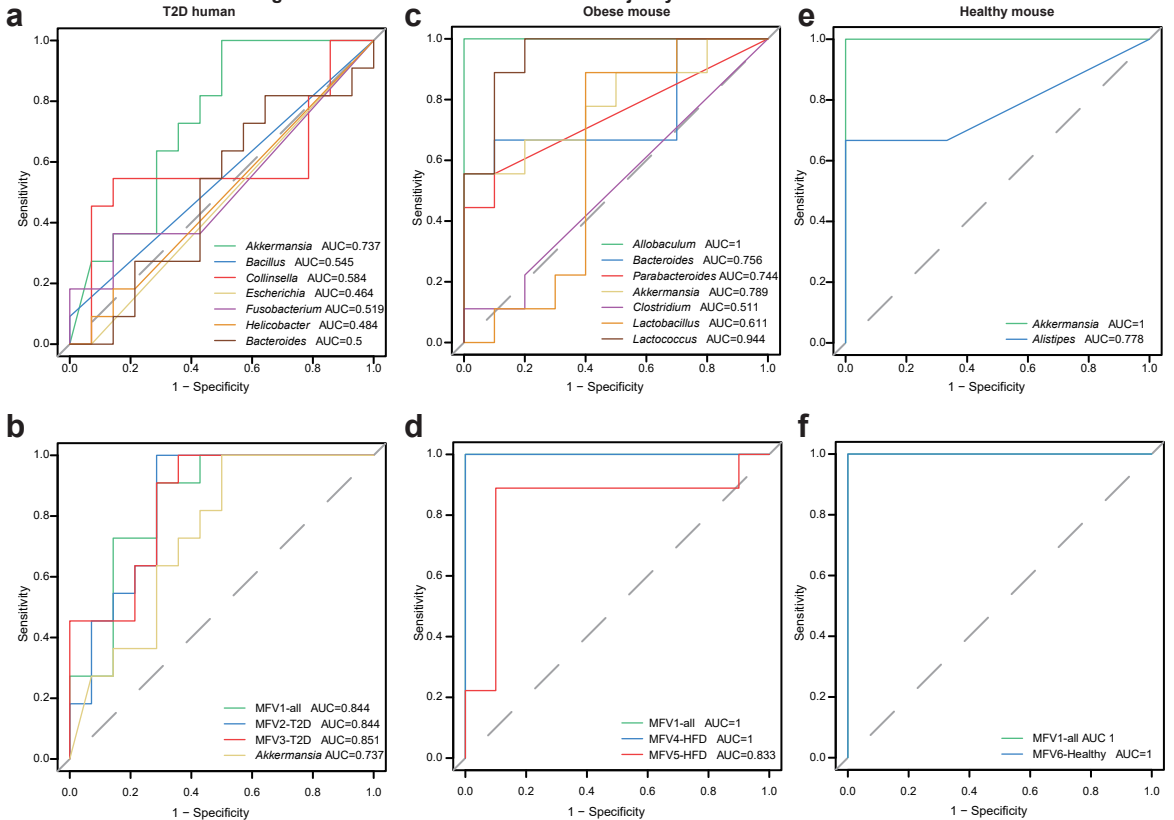

g

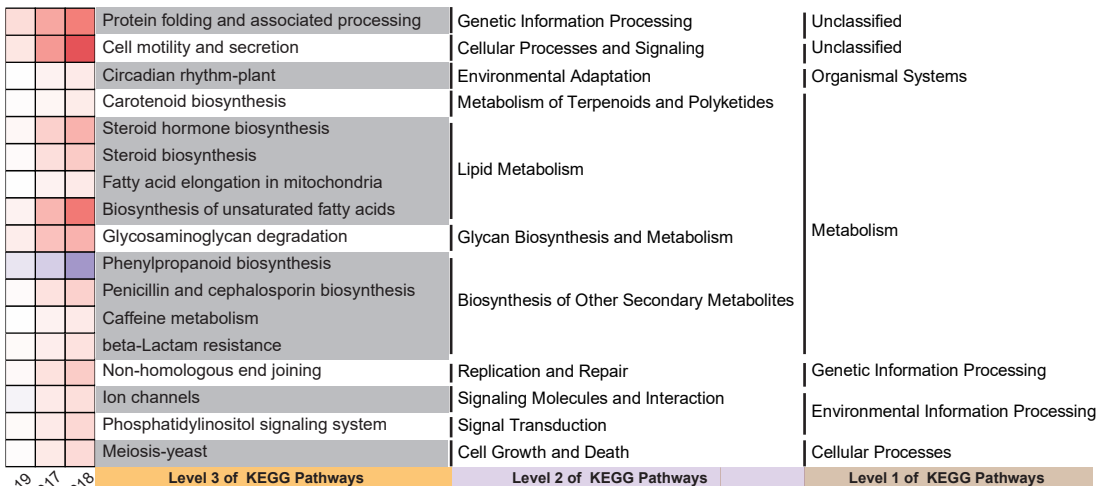

Adeshirlarijany2019  
de J2017  
Ma2018

Difference between means

-0.05 0.00 0.05 0.10 0.15

Supplement: mmc1.pdf [file mmc1.pdf]

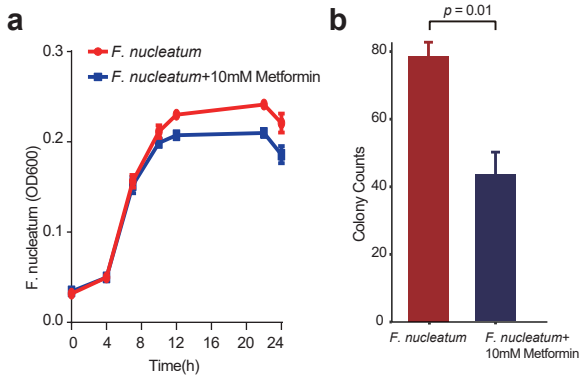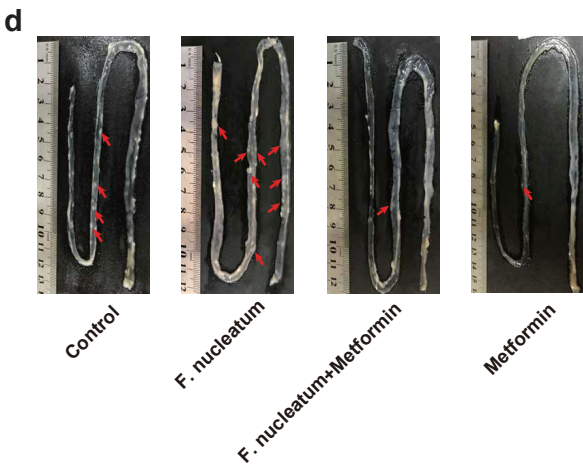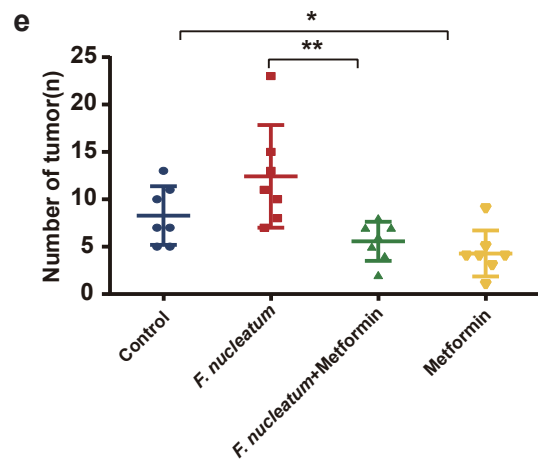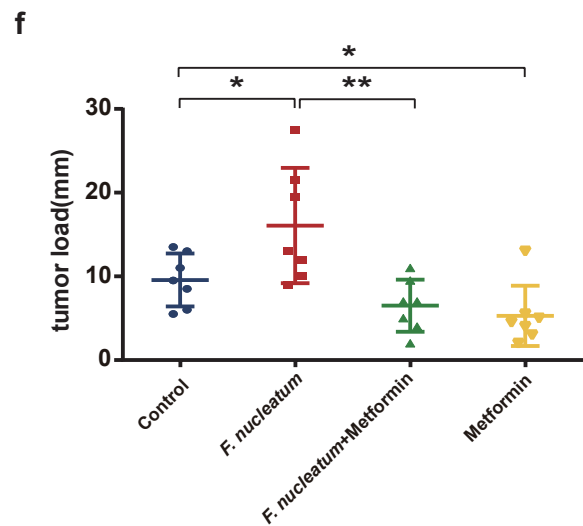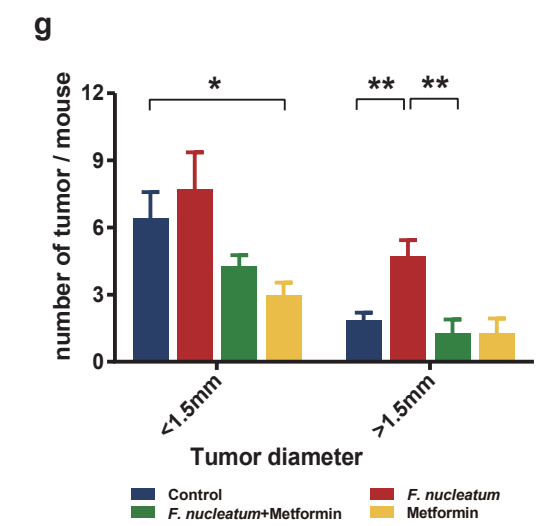

Supplement: mmc2.pdf [file mmc2.pdf]

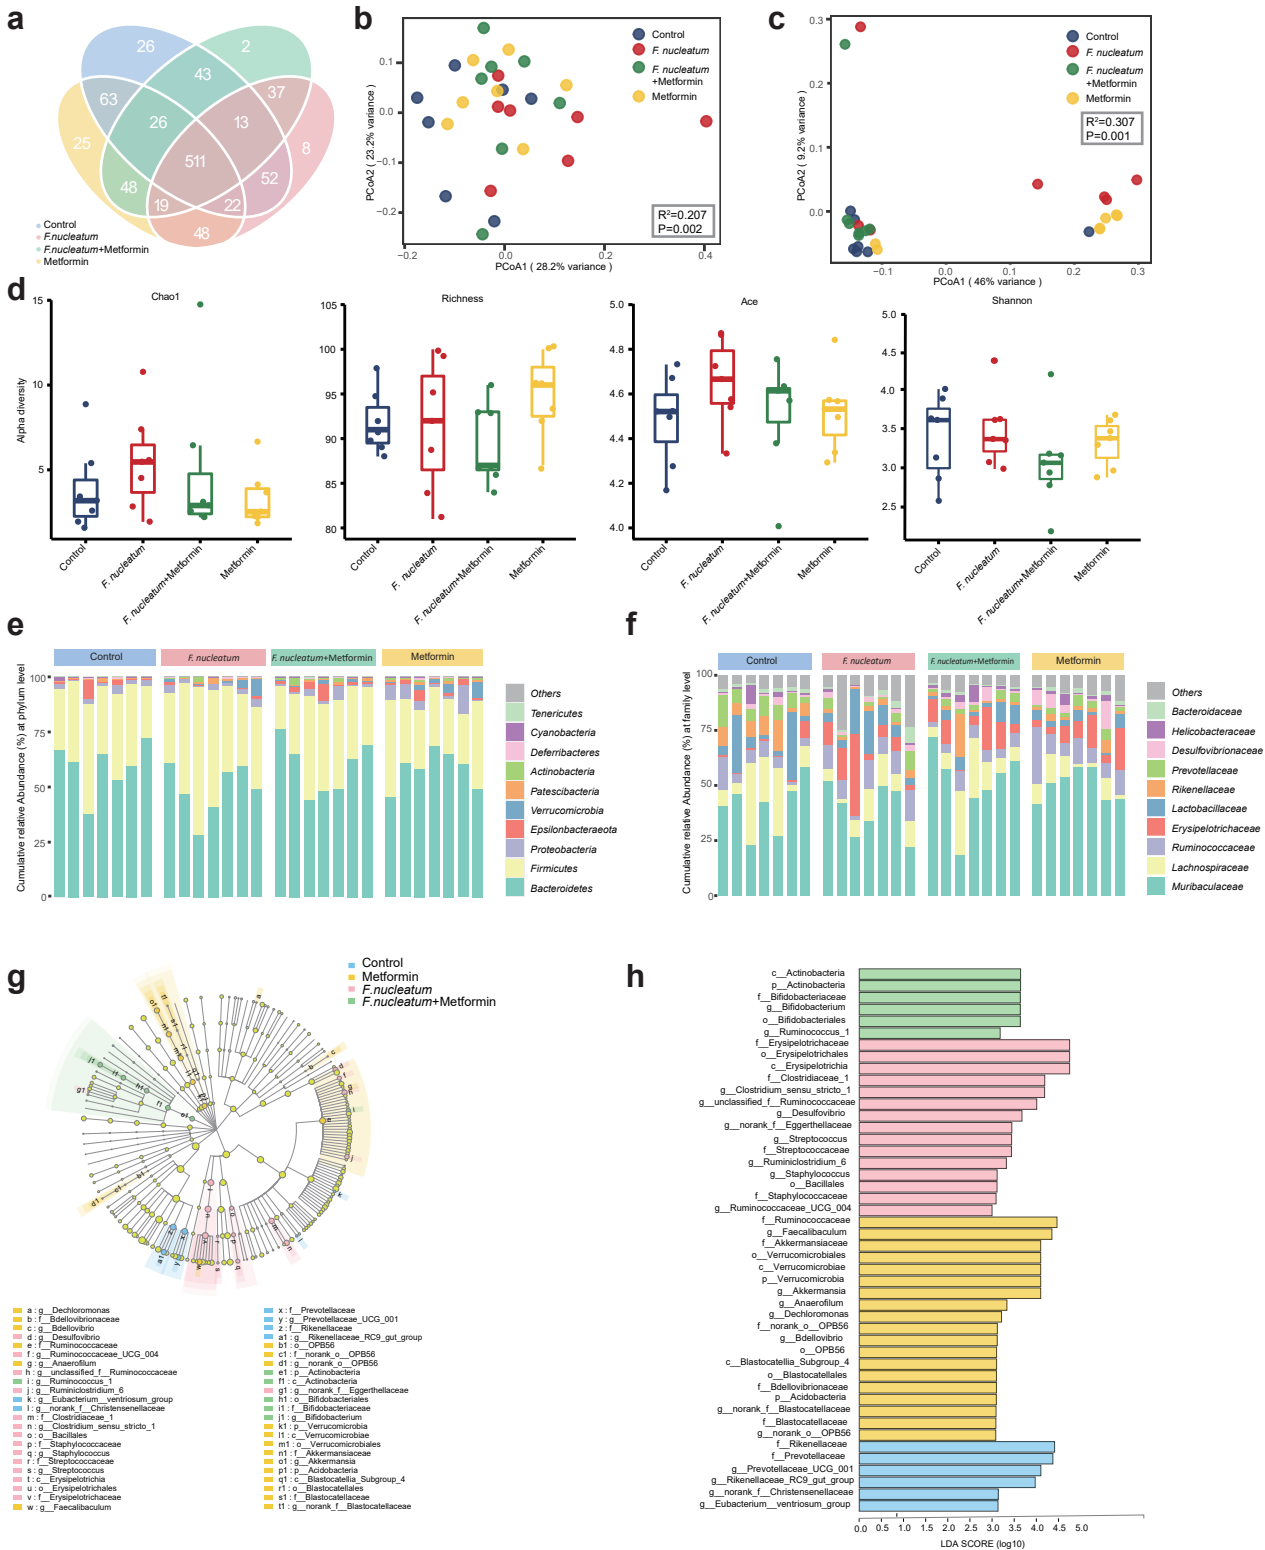

Supplement: mmc3.pdf [file mmc3.pdf]

**a**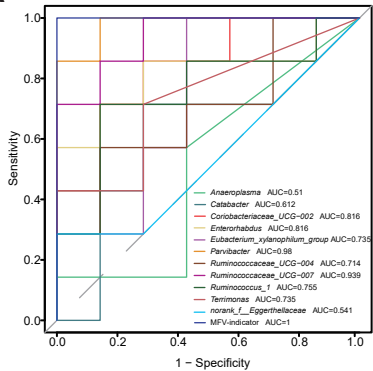**b**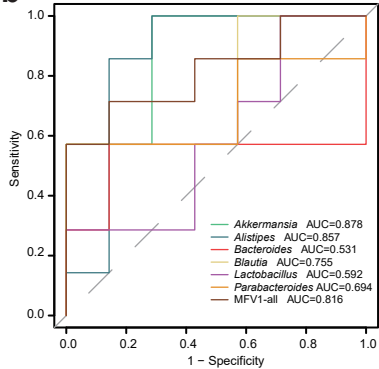**c**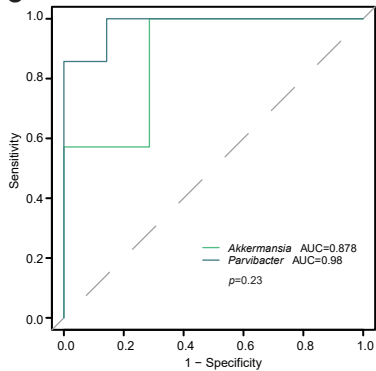

Supplement: mmc4.pdf [file mmc4.pdf]

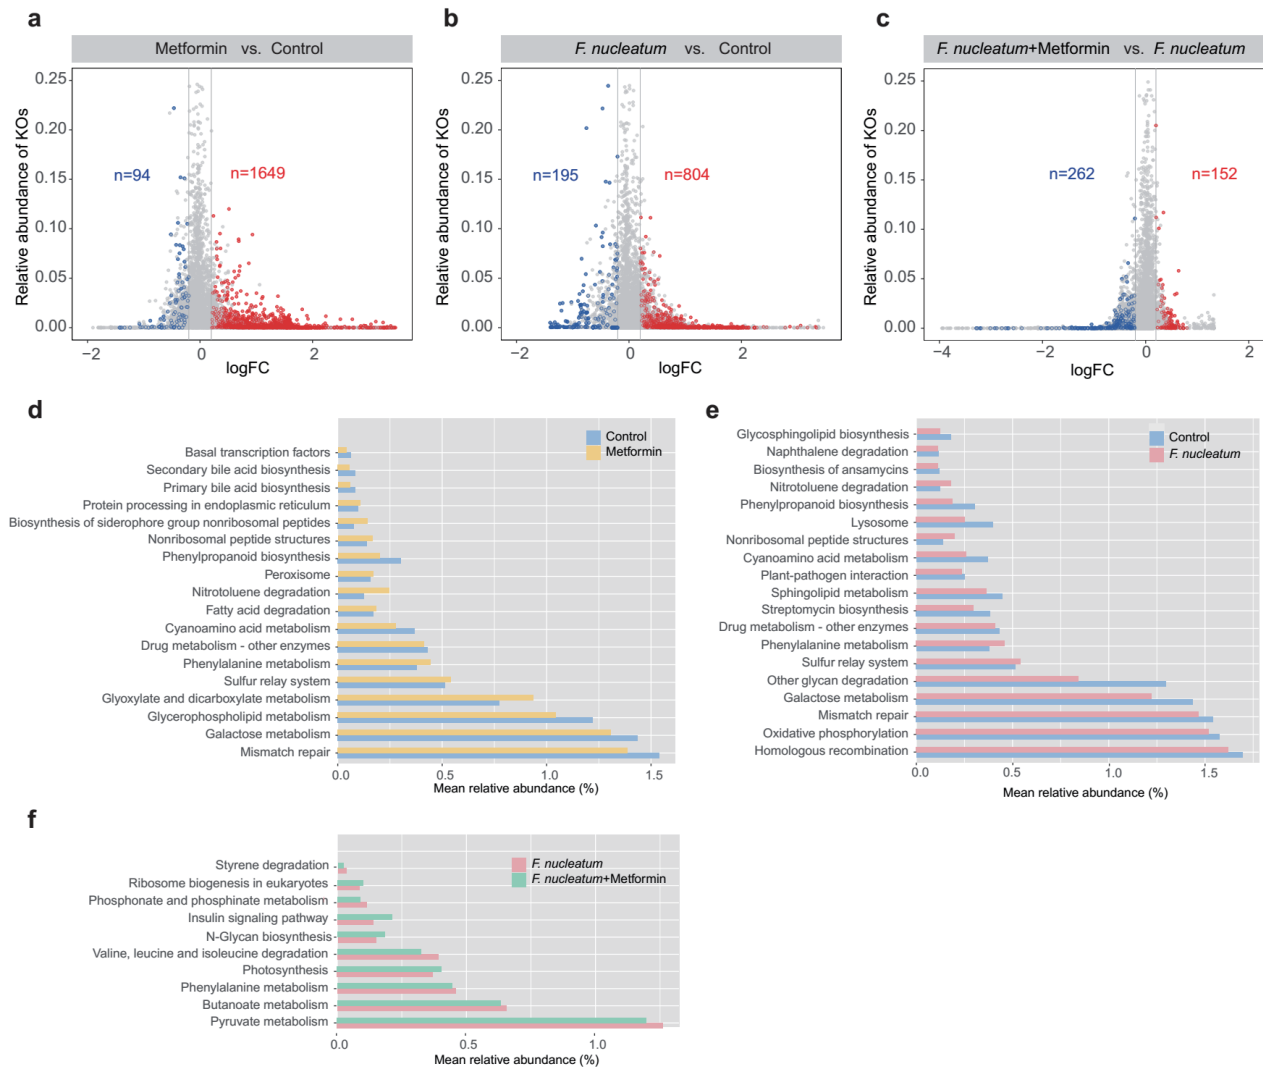

Supplement: mmc5.pdf [file mmc5.pdf]

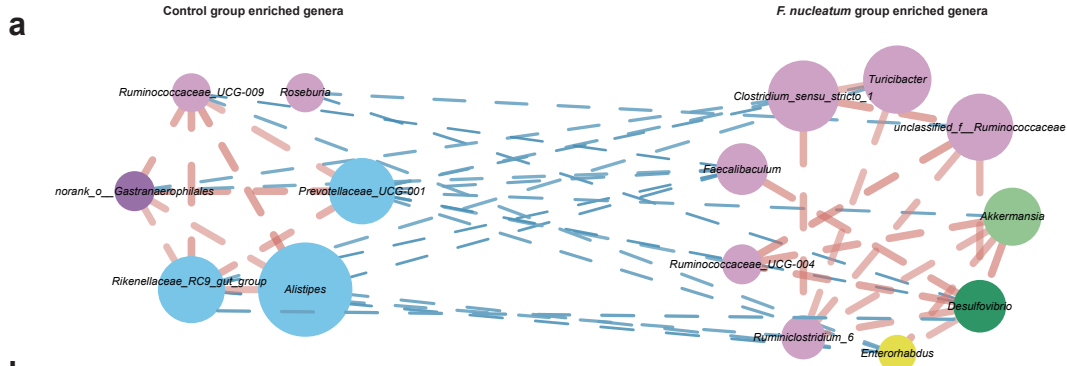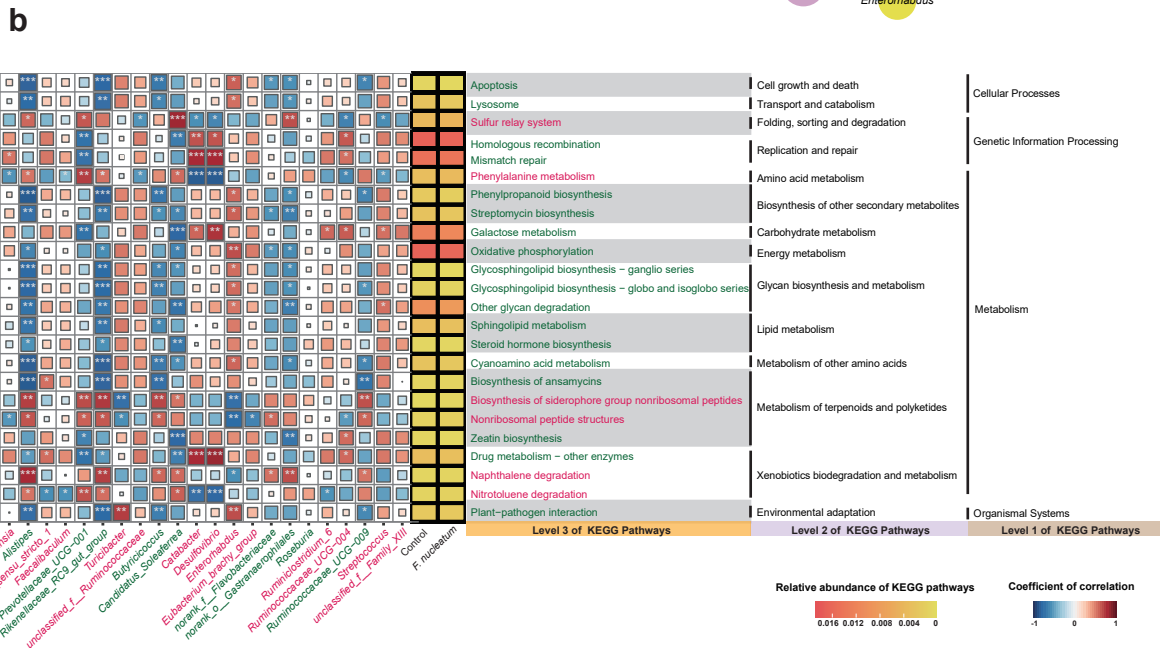

Supplement: mmc6.pdf [file mmc6.pdf]

**a***F. nucleatum*+Metformin group enriched genera*F. nucleatum* group enriched genera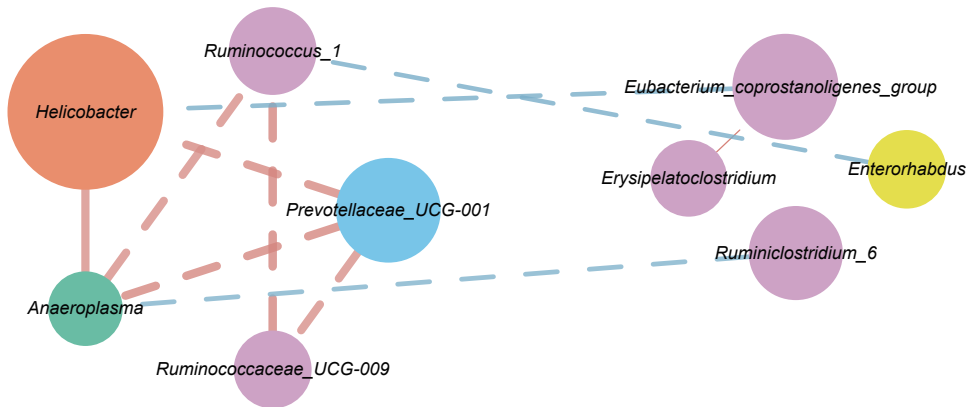**b**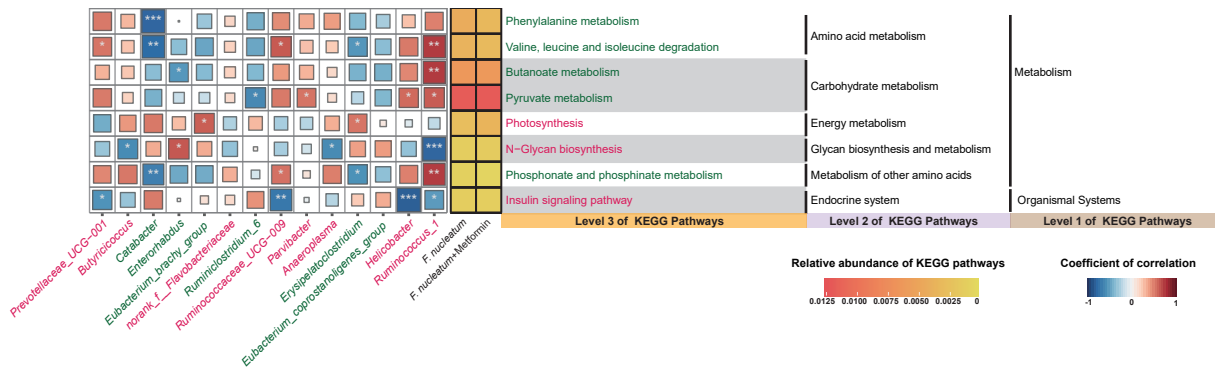

Supplement: mmc7.pdf [file mmc7.pdf]

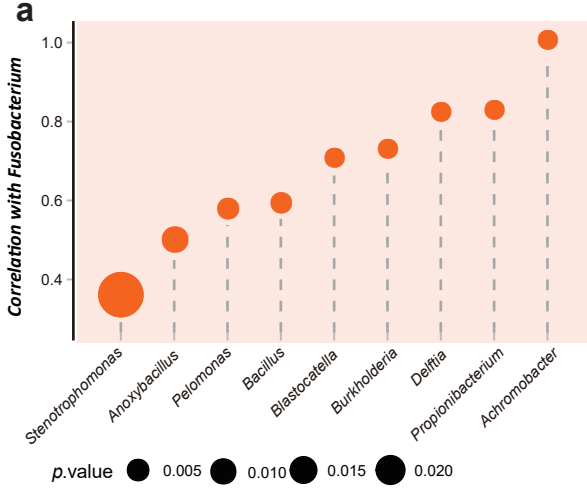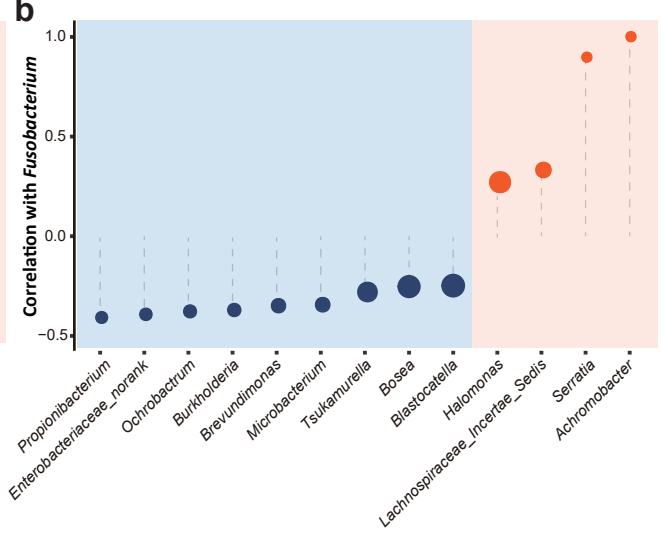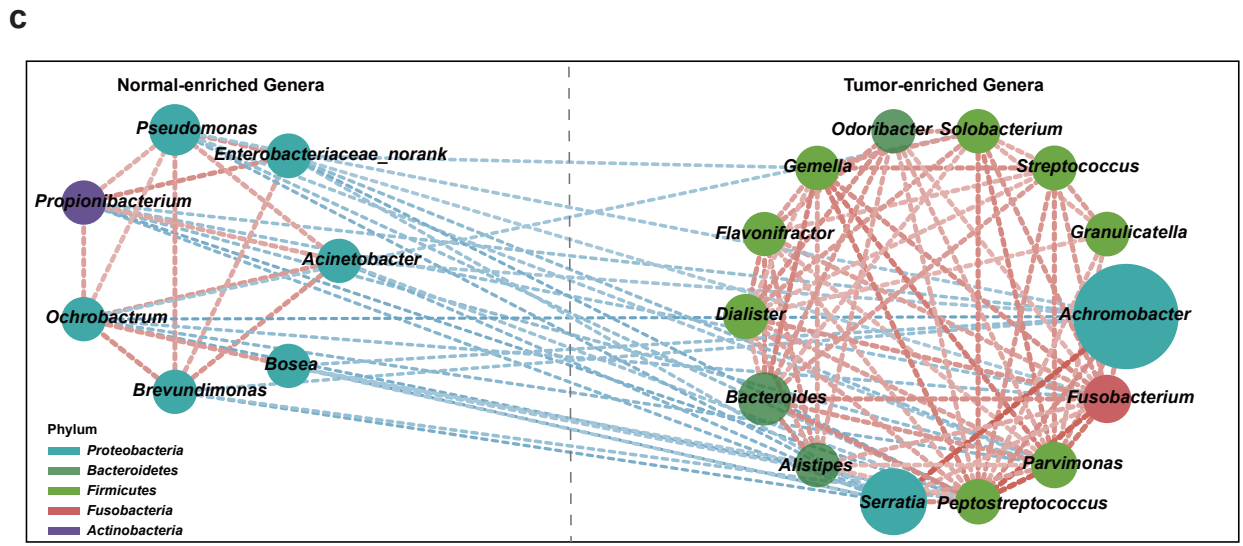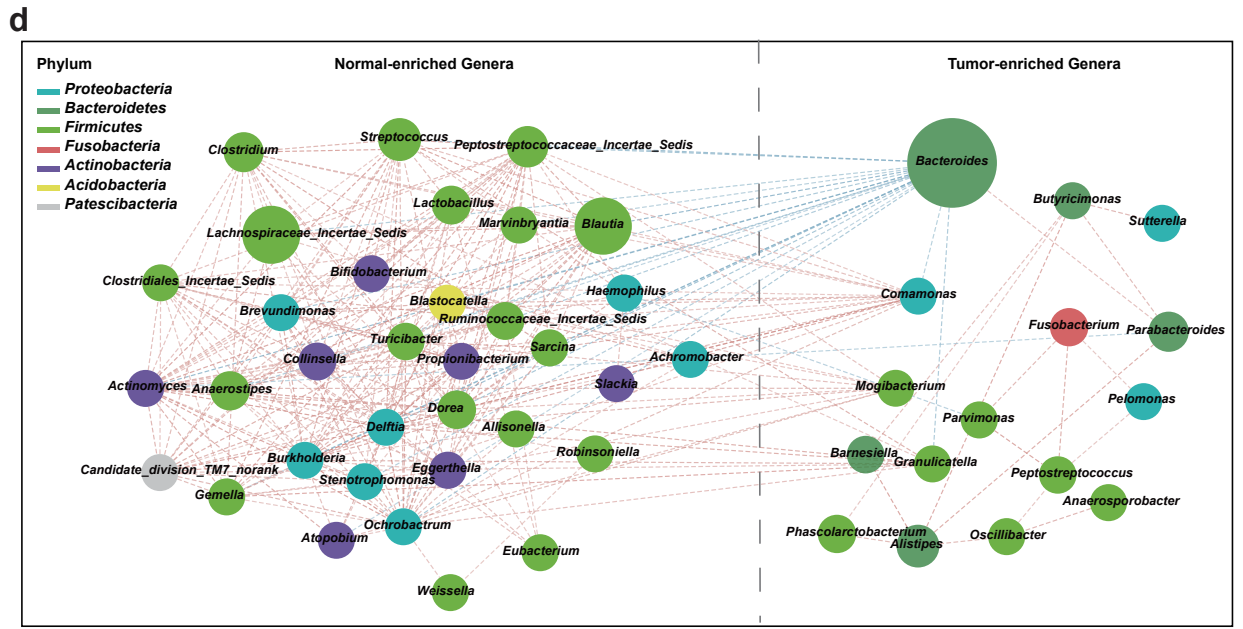

Supplement: mmc8.pdf [file mmc8.pdf]

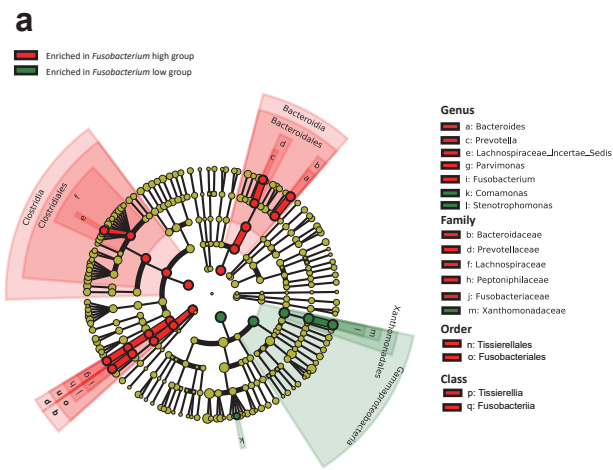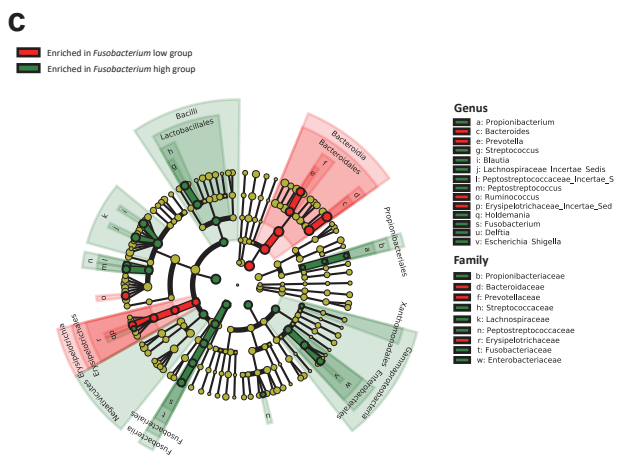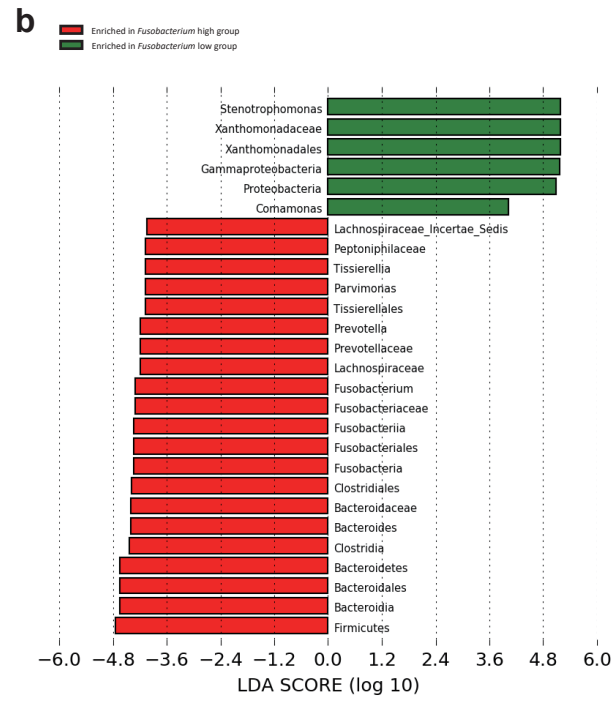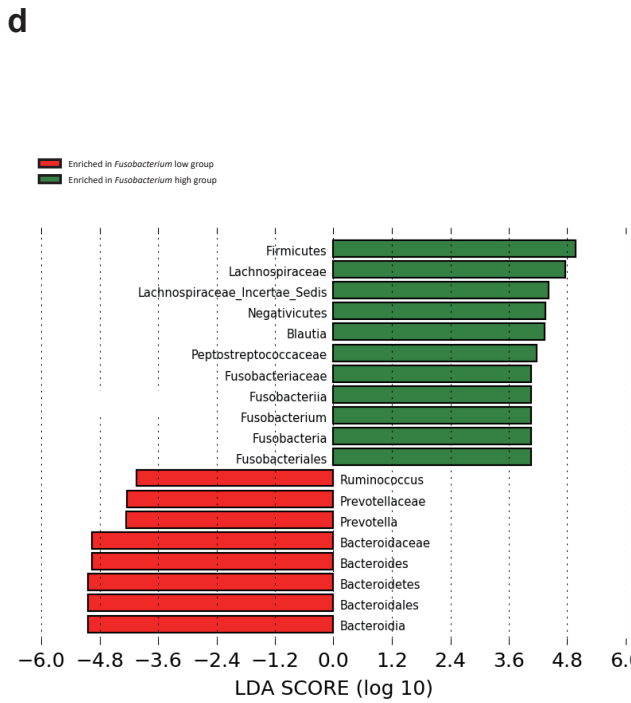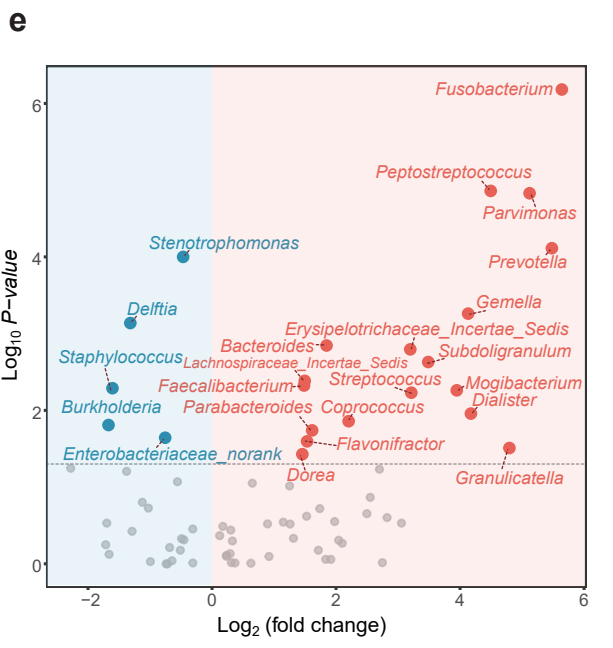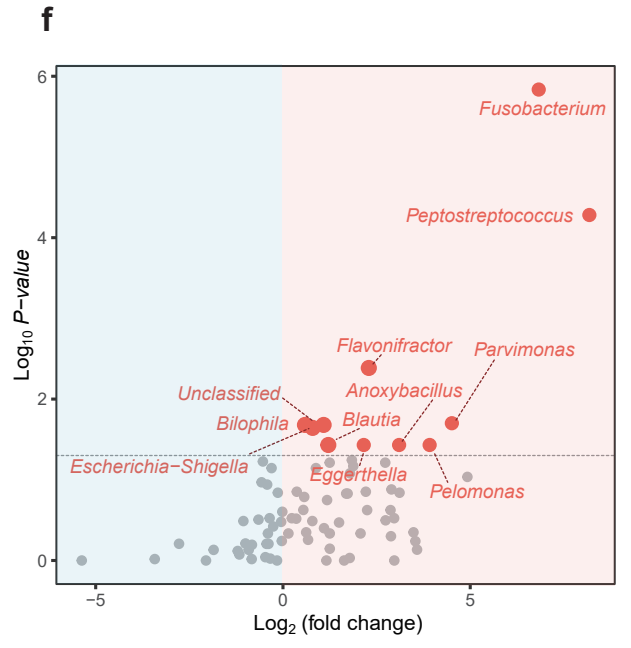

Supplement: mmc9.pdf [file mmc9.pdf]
